# Supplementary material
Source: PubMed Central journal article supplement (PMC3122185)
Supplement: supp_M111.220442_jbc.M111.220442-1.pdf [file supp_M111.220442_jbc.M111.220442-1.pdf]

## Supplementary data

**Table S1.** Primers used in this study. *EcoRI* sites are italicized, *NdeI* sites are highlighted in bold, *XhoI* sites are underlined in bold and *BamHI* sites are underlined.

| Primer                | Sequence                                                 |
|-----------------------|----------------------------------------------------------|
| <i>PEB4-NdeI-F</i>    | 5' CCGGGAATTCCATATGAAAAATTTTCTTTAGTC 3'                  |
| <i>PEB4-XhoI-R</i>    | 5' AATAGAATTCC <b><u>CTCGAG</u></b> TTTATATCCACTTTAGC 3' |
| <i>PEB4VN-NdeI-F</i>  | 5' AATACATATGTTTTTAATTTTAGTTAAT 3'                       |
| <i>PEB4VN-BamHI-R</i> | 5' AATAGGATCCATCATAAAAAGCTTTAACTTTAGC 3'                 |
| <i>PEB4VC-BamHI-F</i> | 5' AATAGGATCCAAAGGTCAAATCAAATTTG 3'                      |
| <i>PEB4VC-XhoI-R</i>  | 5' AATA <b><u>CTCGAG</u></b> CAGCATGATCAGTGTGTA 3'       |
| <i>cj1289-NdeI-F</i>  | 5' AATACATATGAATACCATTAATGCTATAGC 3'                     |
| <i>cj1289-XhoI-R</i>  | 5' AATA <b><u>CTCGAG</u></b> TCTTAAATATTCTATATTGA 3'     |
| <i>cj0694-NdeI-F</i>  | 5' AATACATATGCTTACTTGGATGCAACAT 3'                       |
| <i>cj0694-XhoI-R</i>  | 5' AATA <b><u>CTCGAG</u></b> ATTCCCTTTATAATAAAT 3'       |

**Table S2.** Full structural statistical data for PEB4

|                                      | Native                                              | Se-Met derivative<br>(Peak)                         | Se-Met derivative<br>(Inflection)                   | Se-Met derivative<br>(Remote)                       |
|--------------------------------------|-----------------------------------------------------|-----------------------------------------------------|-----------------------------------------------------|-----------------------------------------------------|
| <b>Data collection</b>               |                                                     |                                                     |                                                     |                                                     |
| Beam line (DLS)                      | I0-2                                                | I0-2/I0-4 <sup>#</sup>                              | I0-2/I0-4 <sup>#</sup>                              | I0-2                                                |
| Wavelength (Å)                       | 0.9780                                              | 0.9801                                              | 0.9803                                              | 0.9745                                              |
| Space group                          | C2                                                  | C2                                                  | C2                                                  | C2                                                  |
| Unit Cell (Å)                        | a=81.4 Å, b=91.6 Å, c=61.6 Å,<br>α= γ=90°, β=102.3° | a=81.2 Å, b=91.7 Å, c=61.3 Å,<br>α= γ=90°, β=102.7° | a=81.2 Å, b=91.7 Å, c=61.3 Å,<br>α= γ=90°, β=102.7° | a=81.2 Å, b=91.7 Å, c=61.3 Å,<br>α= γ=90°, β=102.7° |
| Resolution range (Å)                 | 39.8 – 2.2                                          | 46.4 – 2.6                                          | 39.3-2.5                                            | 19.9-2.6                                            |
| No of measured reflections           | 251133                                              | 277591                                              | 102951                                              | 46409                                               |
| No of unique reflections             | 22272                                               | 13585                                               | 15296                                               | 13954                                               |
| Completeness (%) *                   | 99.5 (100.0)                                        | 100.0 (100.0)                                       | 99.9 (100.0)                                        | 98.2 (90.9)                                         |
| R <sub>pim</sub> <sup>*,1</sup>      | 0.023 (0.138)                                       | 0.027 (0.199)                                       | 0.034 (0.418)                                       | 0.033 (0.194)                                       |
| Mn<l/sd> *                           | 20.3 (5.7)                                          | 30.0 (6.3)                                          | 19.5 (2.2)                                          | 12.5 (3.3)                                          |
| <b>Refinement</b>                    |                                                     |                                                     |                                                     |                                                     |
| R / R <sub>free</sub> <sup>2,3</sup> | 0.234/0.276                                         |                                                     |                                                     |                                                     |
| Overall B-factor (Å <sup>2</sup> )   | 48.2                                                |                                                     |                                                     |                                                     |
| Composition of AU                    | 1 polypeptide chain (residues 22-273), 144 waters   |                                                     |                                                     |                                                     |
| <b>Geometry</b>                      |                                                     |                                                     |                                                     |                                                     |
| RMSD in bond distances (Å)           | 0.011                                               |                                                     |                                                     |                                                     |
| RMSD in bond angles (°)              | 1.1                                                 |                                                     |                                                     |                                                     |
| <b>Ramachandran</b>                  |                                                     |                                                     |                                                     |                                                     |
| % most favored                       | 97.2                                                |                                                     |                                                     |                                                     |
| % additionally allowed               | 2.8                                                 |                                                     |                                                     |                                                     |

# Data were collected from the same crystal at identical wavelengths on both stations as checked by fluorescence scans

\* Data in parentheses correspond to the highest resolution shell

$$1) R_{pim} = \frac{\sum_{hkl} [1/(N-1)]^{1/2} \sum_i |I_i(hkl) - I(hkl)|}{\sum_{hkl} \sum_i I_i(hkl)}$$

$$2) R\text{-factor} = \frac{\sum |F_{obs} - F_{calc}|}{\sum F_{obs}}$$

3) R<sub>free</sub> calculated as as in 2) but using 5% of experimental data excluded from refinement for validation.

**Table S3.** Full structural statistical data for Cj1289

|                                      | Se-Met derivative<br>(Final refinement)       | Se-Met derivative<br>(Peak)                   | Se-Met derivative<br>(Inflection)             | Se-Met derivative<br>(High-Remote)            |
|--------------------------------------|-----------------------------------------------|-----------------------------------------------|-----------------------------------------------|-----------------------------------------------|
| Beam line (DLS)                      | I0-3                                          | I0-3                                          | I0-3                                          | I0-3                                          |
| Wavelength (Å)                       | 0.9840                                        | 0.9801                                        | 0.9803                                        | 0.9686                                        |
| Space group                          | P2 <sub>1</sub> 2 <sub>1</sub> 2 <sub>1</sub> |
| Unit Cell (Å)                        | a=49.6Å, b=94.6Å,<br>c=124.6Å,<br>α=β=γ=90°   | a=49.6Å, b=94.6Å,<br>c=124.4Å, α=β=γ=90°      | a=49.6Å, b=94.6Å,<br>c=124.5Å,<br>α=β=γ=90°   | a=49.6Å, b=94.5Å,<br>c=124.3Å,<br>α=β=γ=90°   |
| Resolution range (Å)                 | 62.3-2.3                                      | 75.3-2.8                                      | 75.3-2.8                                      | 75.2-2.8                                      |
| No of measured reflections           | 189232                                        | 263217                                        | 158243                                        | 52696                                         |
| No of unique reflections             | 26871                                         | 15074                                         | 15070                                         | 14626                                         |
| Completeness (%) *                   | 100 (100.0)                                   | 100 (100.0)                                   | 100 (100.0)                                   | 98.3 (99.6)                                   |
| R <sub>pim</sub> <sup>*,1</sup>      | 0.052 (0.379)                                 | 0.035 (0.169)                                 | 0.051 (0.291)                                 | 0.063 (0.271)                                 |
| Mn<l/sd> *                           | 14.3 (3.2)                                    | 22.3 (6.3)                                    | 15.5 (4.0)                                    | 9.0 (2.9)                                     |
| <b>Refinement</b>                    |                                               |                                               |                                               |                                               |
| R / R <sub>free</sub> <sup>2,3</sup> | 0.225/0.280                                   |                                               |                                               |                                               |
| Overall B-factor (Å <sup>2</sup> )   | 56.5                                          |                                               |                                               |                                               |
| Composition of AU                    | 2 polypeptide chains, 99 waters               |                                               |                                               |                                               |
| <b>Geometry</b>                      |                                               |                                               |                                               |                                               |
| RMSD in bond distances (Å)           | 0.008                                         |                                               |                                               |                                               |
| RMSD in bond angles (°)              | 1.1                                           |                                               |                                               |                                               |
| <b>Ramachandran</b>                  |                                               |                                               |                                               |                                               |
| % most favored                       | 96.0                                          |                                               |                                               |                                               |
| % additionally allowed               | 4.0                                           |                                               |                                               |                                               |

\* Data in parentheses correspond to the highest resolution shell

$$1) R_{pim} = \frac{\sum_{hkl} [1/(N-1)]^{1/2} \sum_i |I_i(hkl) - I(hkl)|}{\sum_{hkl} I_i(hkl)}$$

$$2) R\text{-factor} = \frac{\sum |F_{obs} - F_{calc}|}{\sum F_{obs}}$$

3) R<sub>free</sub> calculated as in 2) but using 5% of experimental data excluded from refinement for validation.

FIGURE S1

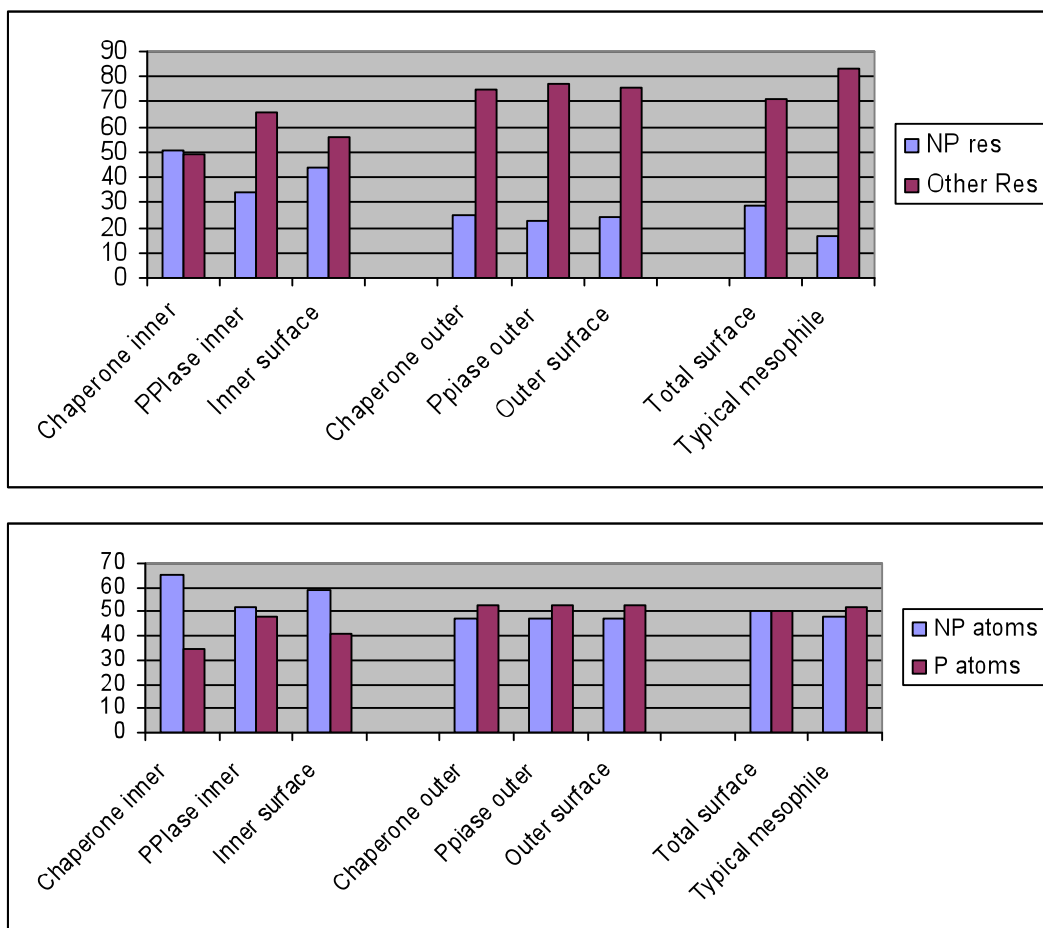

**Figure S1. The inner surfaces of the central cavity of PEB4 are significantly more hydrophobic than the outer surfaces, and than the surfaces of typical mesophiles.** Upper Panel: Proportions (%) of non-polar (blue) surface residues compared to proportion (%) of other (purple) surface residues. Lower Panel: Proportions (%) of non-polar surface atoms (blue) compared to proportion (%) of polar atoms (purple). In both panels from left to right the data are for the chaperone domain inner surface; the PPIase domain inner surface; total inner surface; chaperone domain outer surface; PPIase domain outer surface; total outer surface; total of inner and outer surfaces; values for typical mesophile from Fukuchi and Nishigawa (47) (upper panel) and Britton *et al.* (56) (lower panel).
